# Supplementary material for: A NiFe-based monolithic electrocatalyst for pleiotropic-efficiency water oxidation
Source: Royal Society of Chemistry journal article supplement (doi:10.1039/d2ta06858c), 2022-01-01
Supplement: d2ta06858c1.pdf [file d2ta06858c1.pdf]

## Supplementary Information

### A NiFe-based monolithic electrocatalyst for pleiotropic-efficiency water oxidation

Yuting Li <sup>a</sup>, Weihua Ma <sup>a</sup>, Juan Wang <sup>\*a</sup>, Qin Zhong <sup>\*a</sup>

<sup>a</sup> School of Chemistry and Chemical Engineering, Nanjing University of Science and Technology, Nanjing, Jiangsu, 210094, China.

\*Corresponding author

E-mail: wangjuan304@njust.edu.cn, [zq304@njust.edu.cn](mailto:zq304@njust.edu.cn)

## Experimental Detail

### Materials

Polyacrylonitrile (PAN, Mg: 48,000) was supplied by Sinopec Shanghai Petrochemical (shanghai, China). Thiourea, N, N-dimethylformamide (DMF) and Fe(NO<sub>3</sub>)<sub>3</sub>·9H<sub>2</sub>O, Ni(NO<sub>3</sub>)<sub>2</sub>·6H<sub>2</sub>O were purchased from Shanghai Chemical Reagents. All chemicals were used directly without further purification.

### Characterization

The scanning electron microscopy (SEM) characterization was recorded on a FEI Quanta 250FEG. The high-resolution transmission electron microscopy (HRTEM) and elemental mapping analysis were collected via a Tecnai G2F30 S-Twin. X-ray power diffraction (XRD) pattern was obtained with a Cu K $\alpha$  radiation on a Bruker D8 ADVANCE diffractometer ( $\lambda = 1.5604 \text{ \AA}$ ). The Raman spectra was performed on Aramis confocal Raman microscope ( $\lambda = 532 \text{ nm}$ ). X-ray photoelectron spectroscopy (XPS) was tested on a Thermo-VG Scientific Escalab 250Xi spectrometer with Al K $\alpha$  X-ray source. The nitrogen adsorption-desorption characterization was investigated with an ASAP2460

Micromeritics equipment at 77 K. *In situ* FTIR spectra was tested on Thermo Scientific Nicolet iZ10. ICP analysis was detected on Perkinelmer Avio 500.

## Electrochemical measurements

All potentials were referenced to the reversible hydrogen electrode (RHE) according to the equation:  $E_{RHE} = E_{Hg/HgO} + 0.059 \times pH + 0.098 V$ . Linear sweep voltammetry (LSV) was carried out at a scan rate of  $2 \text{ mV s}^{-1}$ . Electrochemical impedance spectroscopy (EIS) was measured at 0.17 V with frequency ranging from  $10^5 \text{ Hz}$  to  $1 \text{ Hz}$  at an AC amplitude of 5 mV. The stability performance was measured by the chronopotentiometry method at a constant voltage of 1.5 V vs RHE.

The catalyst's electrochemically active surface area (ECSA) was evaluated by measuring the double-layer capacitance ( $C_{dl}$ ) with cyclic voltammetry. The ECSA was obtained according to the following equation:

$$ECSA = \frac{C_{dl}}{C_s}$$

where  $C_s$  is the specific capacitance of atomically smooth planar per unit area with the value of  $40 \mu\text{F} \cdot \text{cm}^{-2}$  in alkaline electrolyte.<sup>1</sup>

The following formula was used to calculate the turnover frequency (TOF) values:

$$TOF = \frac{I}{4FM}$$

where  $I$  is the current at a specific overpotential; 4 is the electron transfer number for OER;  $F$  is the Faradic constant ( $96,485 \text{ C} \cdot \text{mol}^{-1}$ );  $M$  is the number of active sites (mol), which can be determined according to previous study reported by Yan et al.<sup>2</sup>

The faradaic efficiency (FE) for OER was studied by rotating ring-disk electrode (RRDE). The generated  $\text{O}_2$  molecules were detected by oxygen reduction reaction when the ring potential was 0.4 V. The FE value of  $\text{O}_2$  was calculated using the following equation:<sup>1</sup>

$$FE = \frac{I_{ring}}{I_{disk} \times N}$$

Where  $I_{ring}$  means the ring current.  $I_{disk}$  denotes the disk current. N represents the collection efficiency (here is 0.2).

### ***In situ* Raman measurement**

The *in situ* Raman spectra was collected on a Raman microscope (LabRAM HR evolution, HORIBA) excited with a 532 nm laser and a power of 1 mW. The prepared catalyst (working electrode), graphene rod (counter electrode), and Hg/HgO (reference electrode) are inserted into a custom-made spectral-electrochemical cell filled with 1 M KOH electrolyte, which is displayed in Fig. S11. The as-prepared fibrous catalyst was directly clamped as a working electrode. Before carrying out the *in situ* Raman experiments, the sample had been activated via multiple CV scans for 5-6 h under scan rate of  $2 \text{ mV s}^{-1}$ . Each Raman spectra was collected with an acquisition time of 20 s under current-time (i-t) measurement at a constant potential by a confocal Raman microscope coupled with 50×objective.

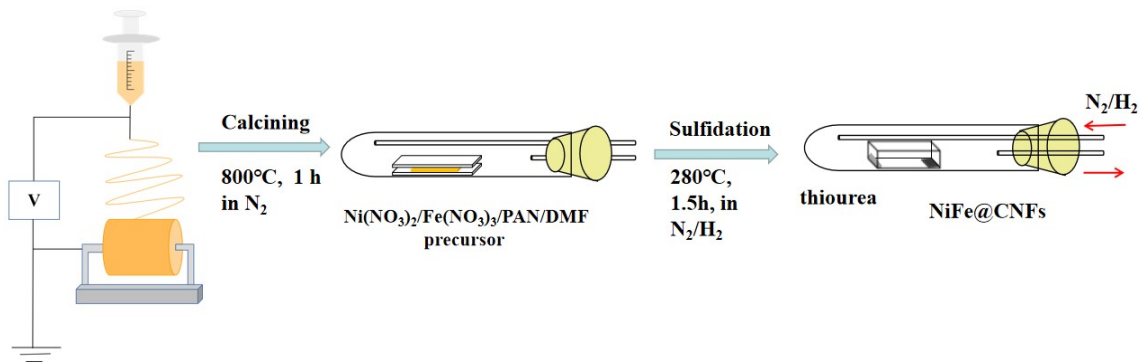

**Fig. S1** Illustration of the synthetic process for NiFe-S@CNFs.

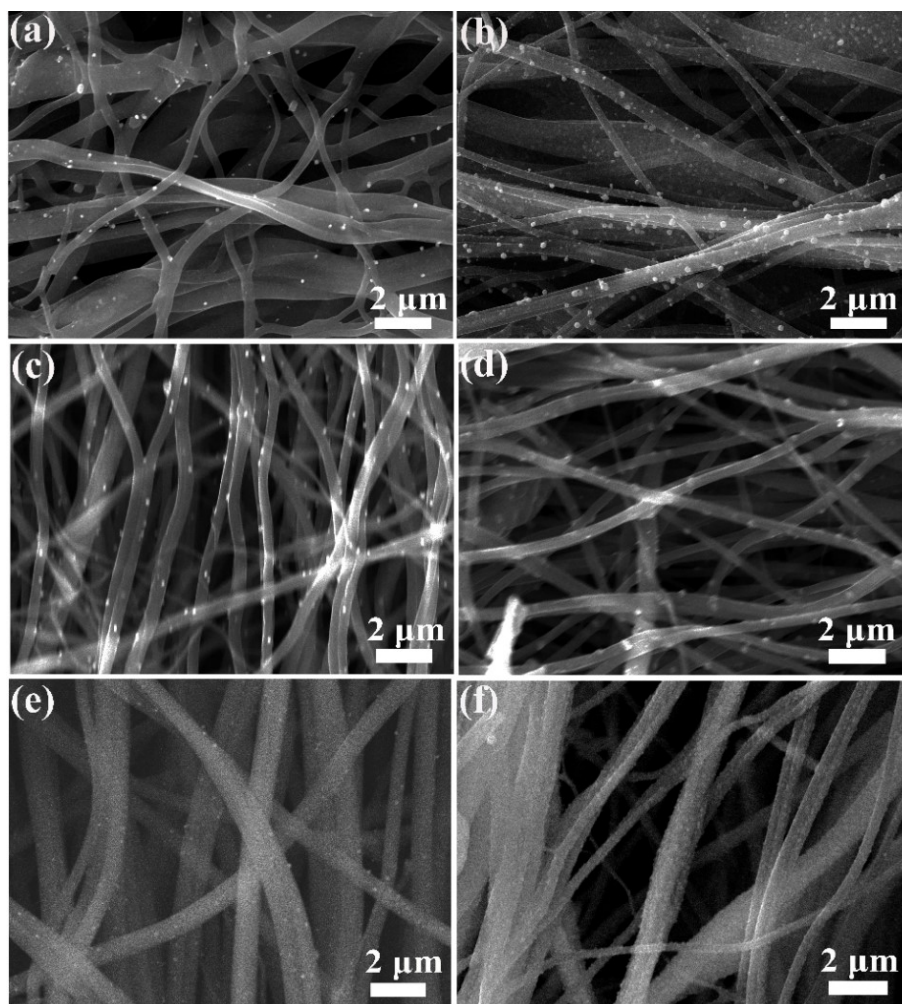

**Fig. S2** SEM images of (a) Ni@CNFs, (b) Ni<sub>3</sub>S<sub>2</sub>@CNFs, (c) NiFe-31@CNFs, (d) NiFe-S-31@CNFs, (e) NiFe-11@CNFs and (f) NiFe-S-11@CNFs.

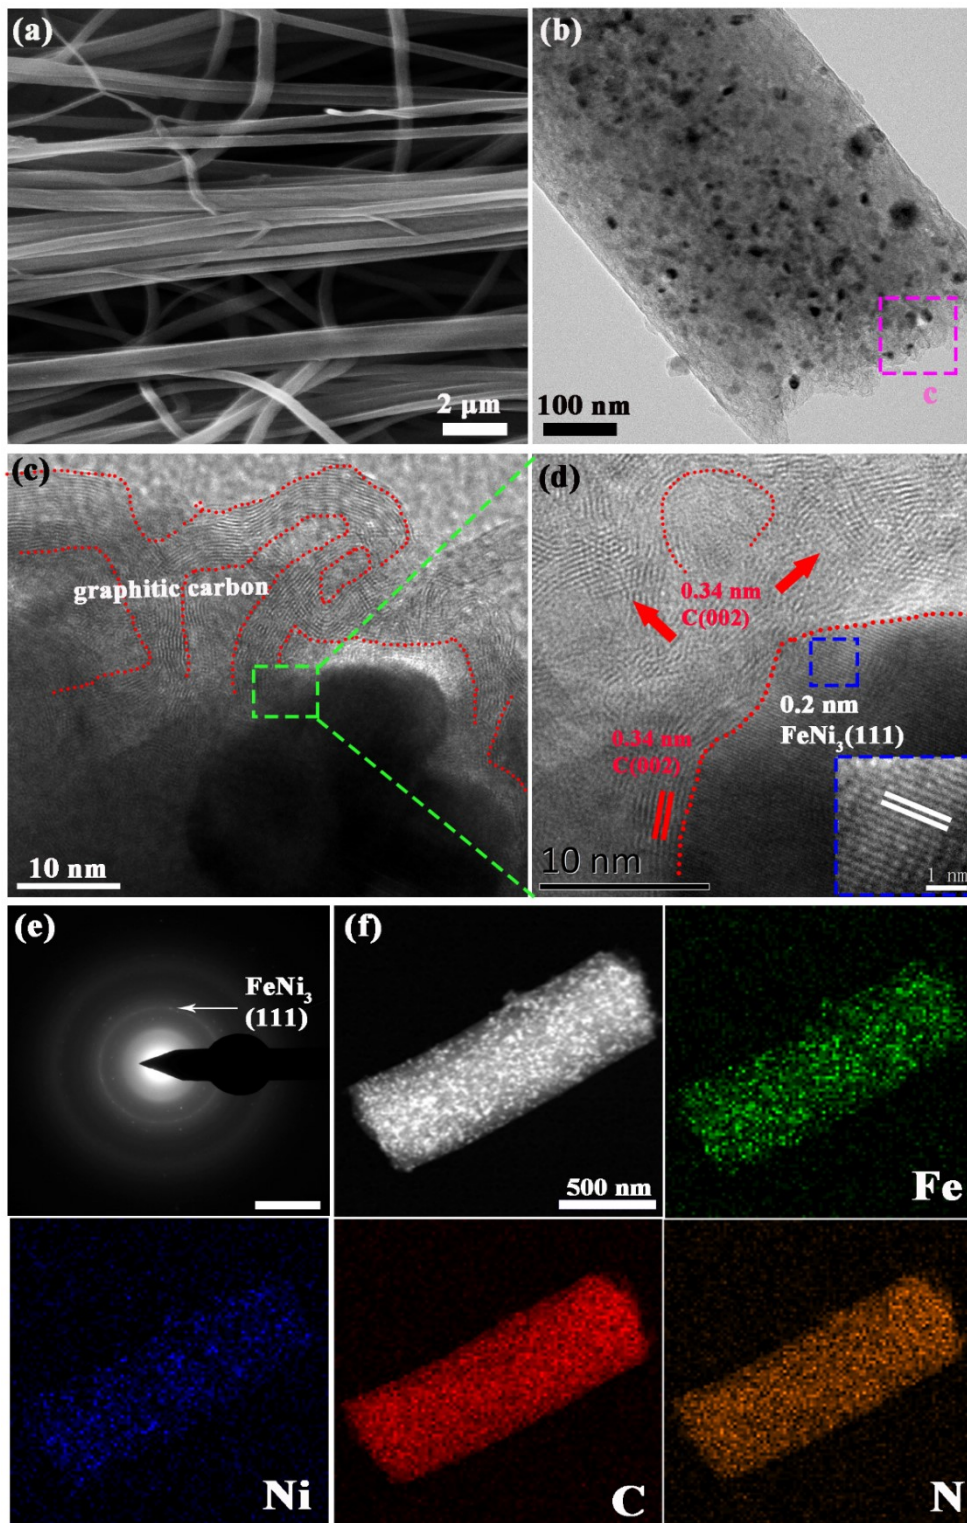

**Fig. S3** (a) SEM image of the NiFe-13@CNFs; (b) TEM and (c, d) High-resolution TEM images of NiFe-13@CNFs; (e) corresponding SAED pattern of NiFe-13@CNFs; (f) Element mapping images of NiFe-13@CNFs.

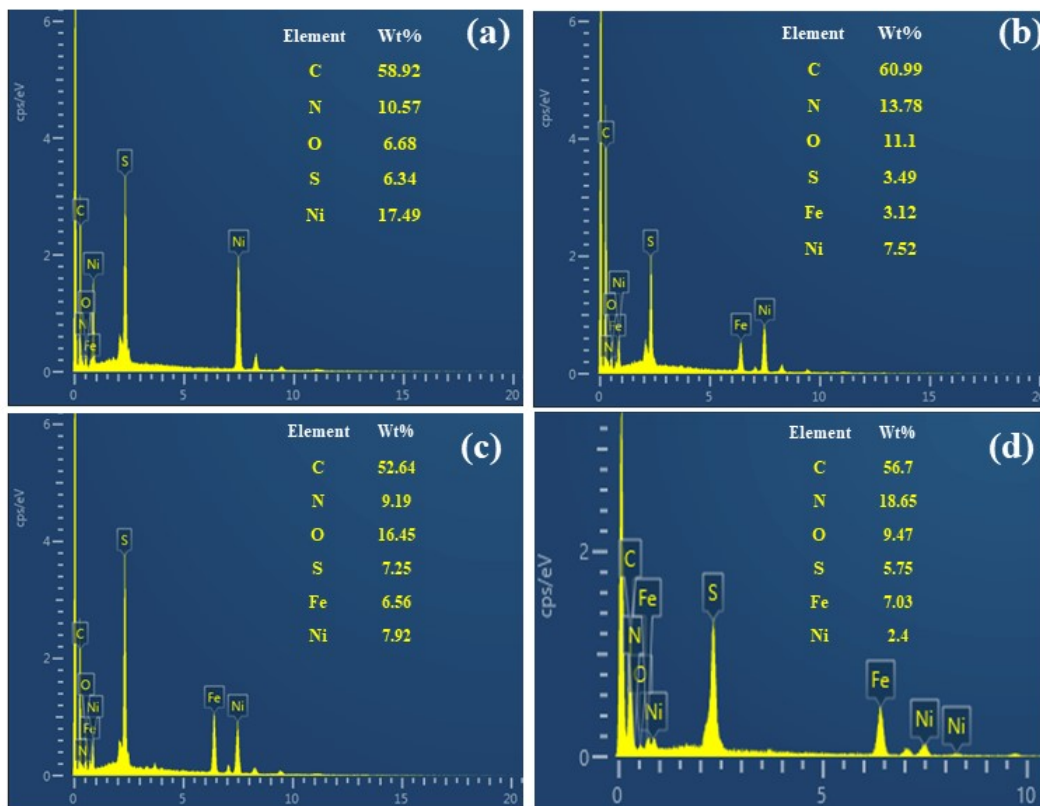

**Fig. S4** EDX spectra and corresponding element contents of (a)  $\text{Ni}_3\text{S}_2@\text{CNFs}$ , (b)  $\text{NiFe-S-31}@\text{CNFs}$ , (c)  $\text{NiFe-S-11}@\text{CNFs}$  and (d)  $\text{NiFe-S-13}@\text{CNFs}$  samples.

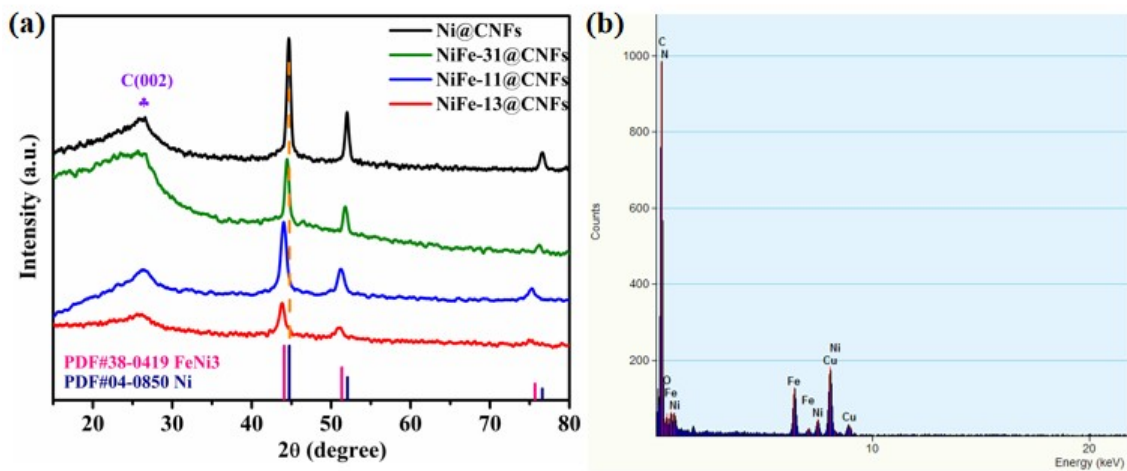

**Fig. S5** (a) XRD patterns of alloy  $\text{NiFe-xy}@\text{CNFs}$ ; (b) EDX spectra of  $\text{NiFe-13}@\text{CNFs}$ .

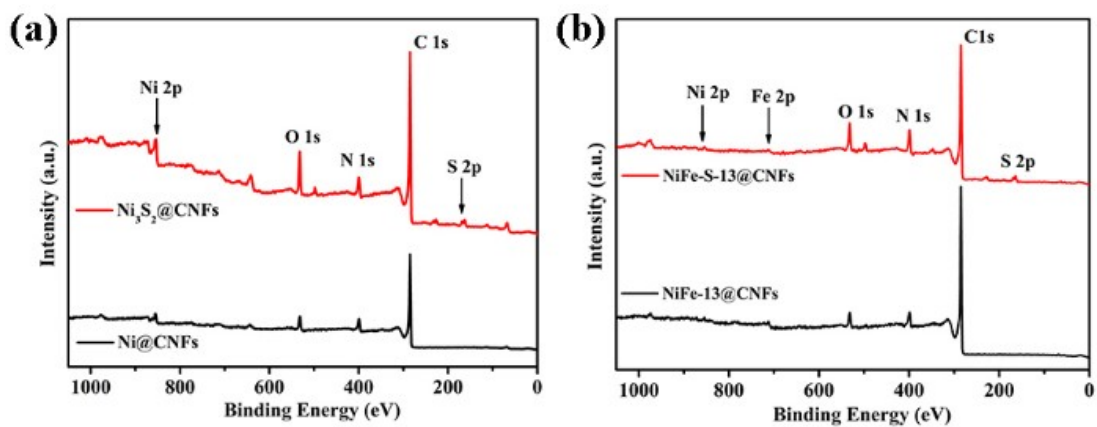

**Fig. S6** (a) XPS surveys of Ni@CNFs and Ni<sub>3</sub>S<sub>2</sub>@CNFs; (b) XPS surveys of NiFe-13@CNFs and NiFe-S-13@CNFs.

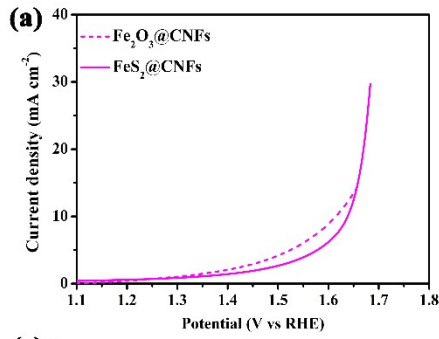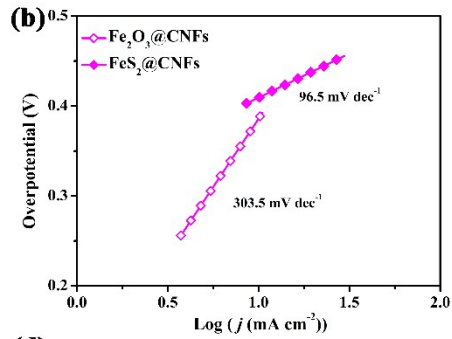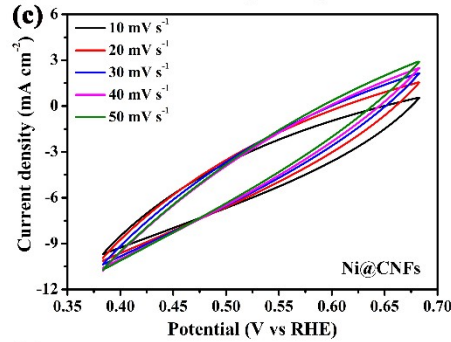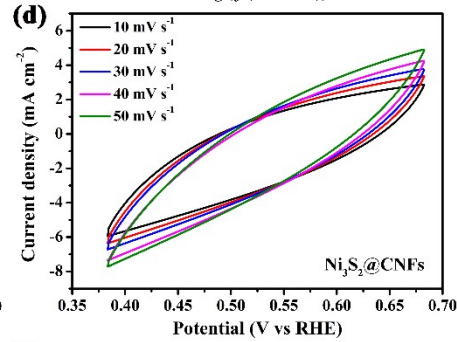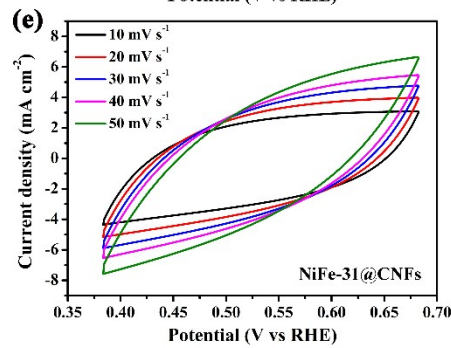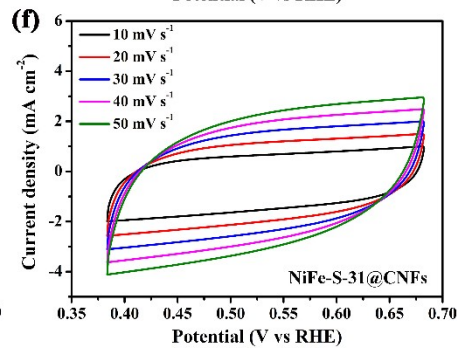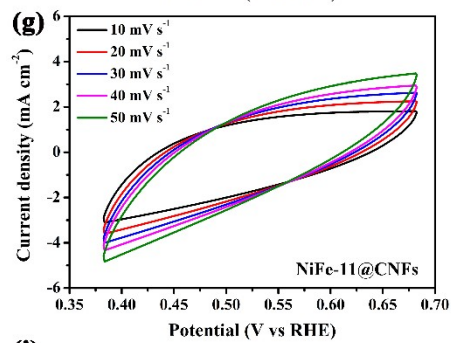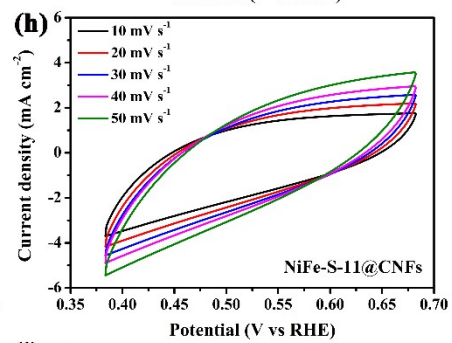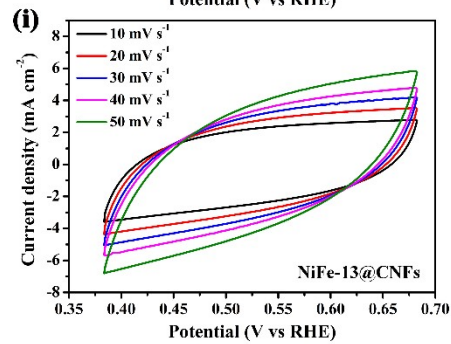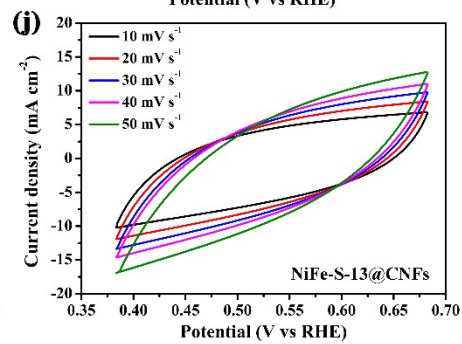



**Fig. S7** (a) LSV curves (iR-corrected) curves and (b) corresponding Tafel slope curves of  $\text{Fe}_2\text{O}_3@\text{CNFs}$  and  $\text{FeS}_2@\text{CNFs}$  for OER in 1.0 M KOH, the required overpotentials were 385 and 408 mV at  $10 \text{ mA cm}^{-2}$  for  $\text{Fe}_2\text{O}_3@\text{CNFs}$  and  $\text{FeS}_2@\text{CNFs}$ , respectively; (c-j) Cyclic voltammetry curves at 0.38–0.68 V vs RHE with different scan rates from 10 to  $50 \text{ mV s}^{-1}$  for all samples.

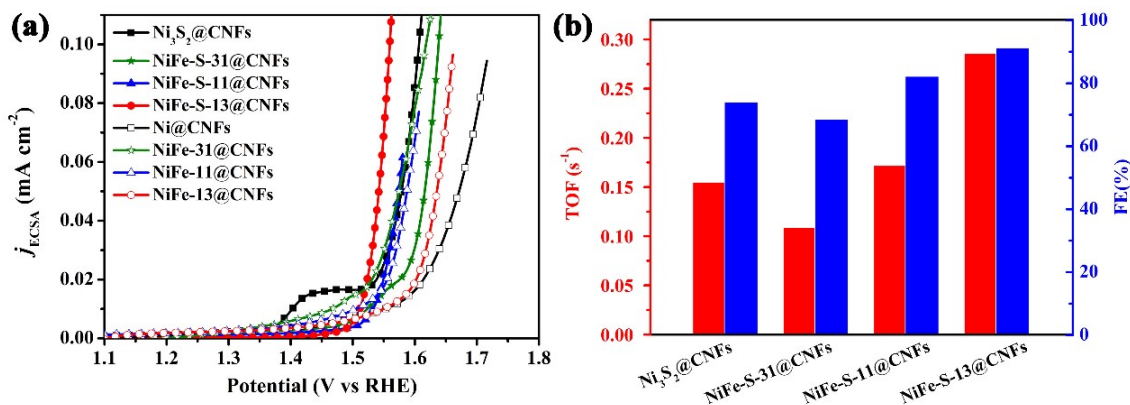

**Fig. S8** (a) OER polarization curves standardized by ECSA for all-samples; (b) TOF values of at the overpotential of 300 mV and Faradic efficiency (FE) for  $\text{Ni}_3\text{S}_2@\text{CNFs}$  and  $\text{NiFe-S}@\text{CNFs}$  series.

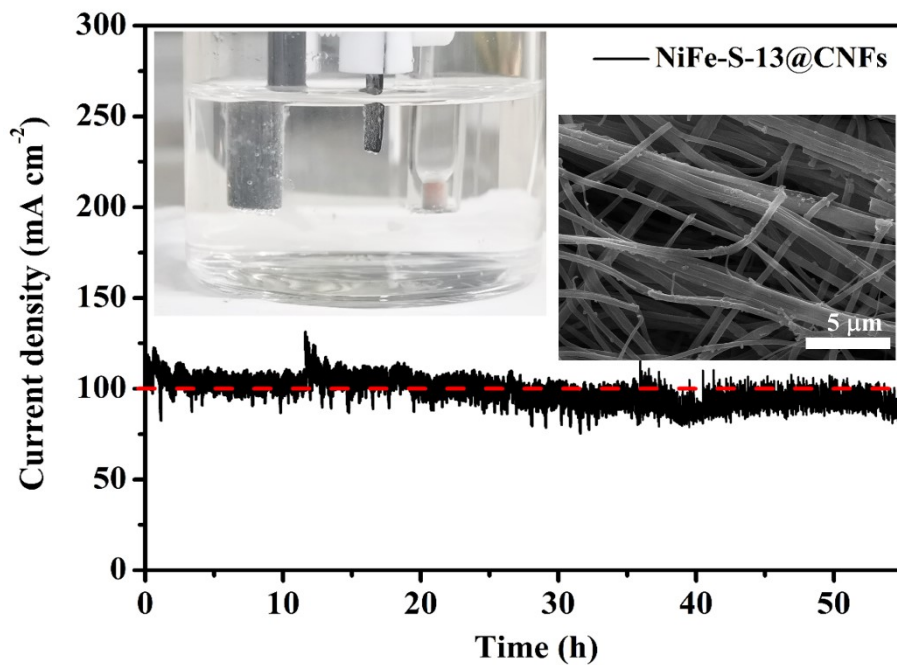

**Fig. S9** Chronopotentiometry curve of  $\text{NiFe-S-13}@\text{CNFs}$  at high current density of  $100 \text{ mA cm}^{-2}$  for 55 h (inset: SEM image of  $\text{NiFe-S-13}@\text{CNFs}$  after durability and a photography of OER process).

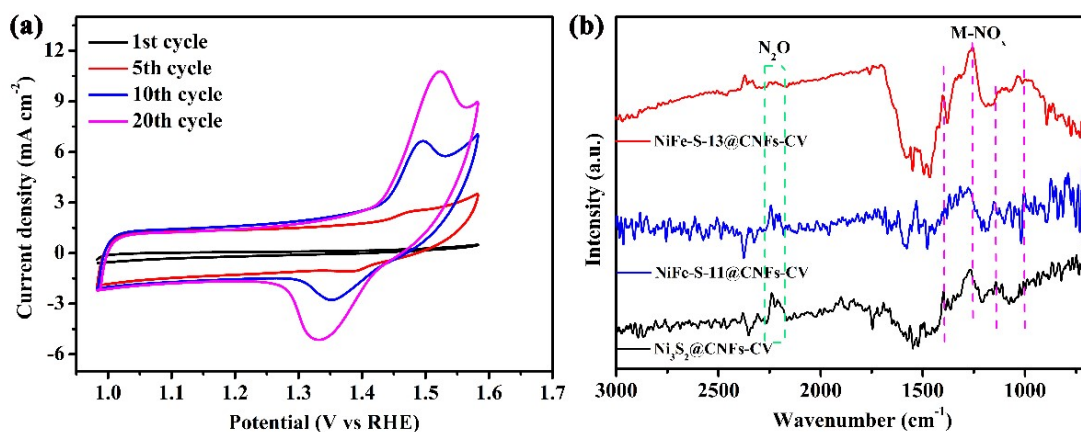

**Fig. S10** (a) Cyclic voltammogram curves of  $\text{Ni}_3\text{S}_2@\text{CNFs}$  at different cycles; (b) *In situ* DRIFT spectra of NO adsorption for  $\text{Ni}_3\text{S}_2@\text{CNFs}$ ,  $\text{NiFe-S-11}@\text{CNFs}$  and  $\text{NiFe-S-13}@\text{CNFs}$  after CV activation.

Fig. S10b presents that the peaks at 2209 and 2239  $\text{cm}^{-1}$  are ascribed to the  $\text{N}_2\text{O}$ , indicated of the occurrence of partial NO reduction into  $\text{N}_2\text{O}$ . Meanwhile, the peaks around 1001-1398  $\text{cm}^{-1}$  correspond to  $\text{M-NO}_x$  that are reaction intermediates  $\text{NO}_x$  species adsorbed on the metal sites. Compared to the Fe-free  $\text{Ni}_3\text{S}_2@\text{CNFs}$ , with the increasing Fe contents, the  $\text{N}_2\text{O}$  peak decreases while the  $\text{M-NO}_x$  peaks increase, implying that Fe site is mainly NO absorption site and the high oxidized Fe is formed.

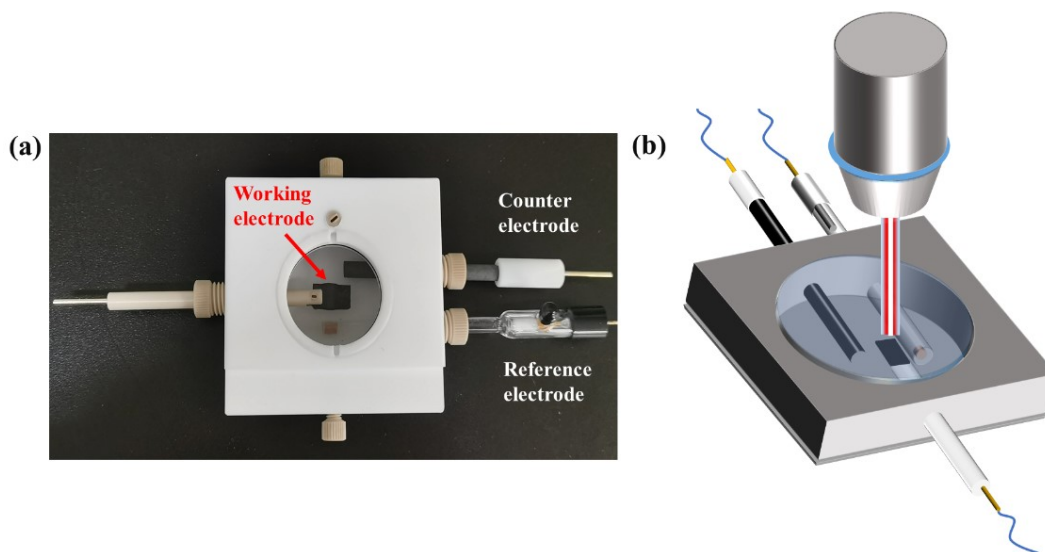

**Fig. S11** (a) A photograph of *in-situ* Raman electrolysis cell. (b) Schematic illustration of *in-situ* Raman process.

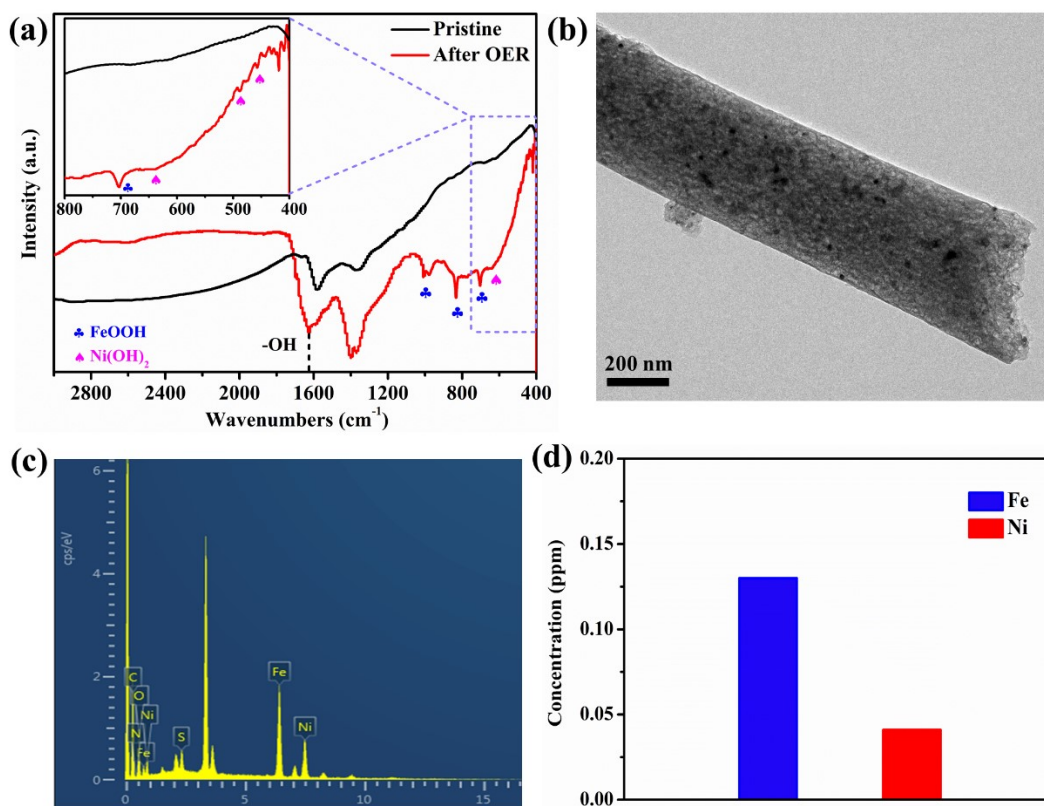

**Fig. S12** (a) FTIR spectra, (b) TEM image and (c) EDS spectra of NiFe-S-13@CNFs after OER; (d) Concentration of Fe and Ni elements in electrolyte after durability of NiFe-S-13@CNFs.

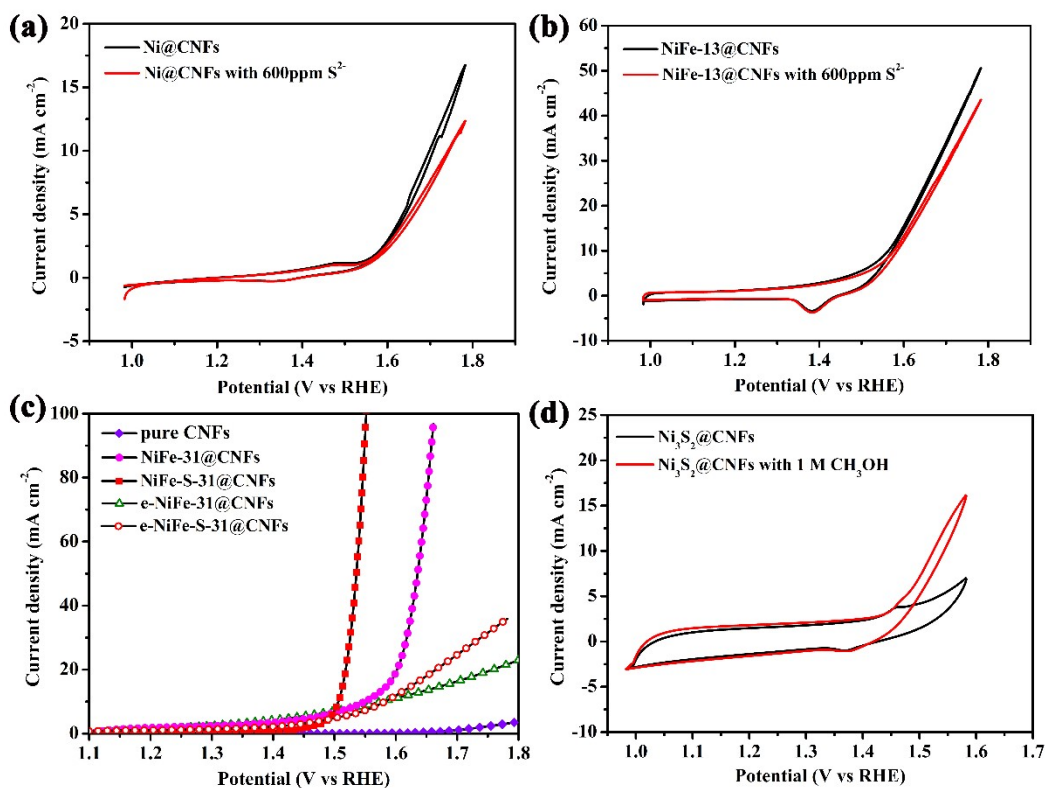

**Fig. S13** CV curves of (a) Ni@CNFs and (b) NiFe-13@CNFs with and without 600 ppm S<sup>2-</sup> in the electrolyte. (c) LSV curves (iR-corrected) for OER before and after oxalic acid treatment (PAN was carbonized to gain pure-CNFs without metals; e- NiFe-13@CNFs was prepared from acid treatment of NiFe-13@CNFs via using 0.5 M oxalic acid for 3 days; e-NiFe-13@CNFs was further sulfide to synthesize e-NiFe-S-13@CNFs). (d) CV curves (without iR-correction) of Ni<sub>3</sub>S<sub>2</sub>@CNFs before and after adding 1.0 M CH<sub>3</sub>OH.

**Table S1** Summary of fitted  $R_s$ ,  $R_{ct}$  and  $C_{dl}$  values for all synthesized samples.

| Samples                              | $R_s / \Omega$ | $R_{ct} / \Omega$ | $C_{dl} / \text{mF cm}^{-2}$ |
|--------------------------------------|----------------|-------------------|------------------------------|
| Ni@CNFs                              | 11.85          | 6.55              | 8.19                         |
| NiFe-31@CNFs                         | 9.47           | 2.89              | 4.27                         |
| NiFe-11@CNFs                         | 9.89           | 1.977             | 28.9                         |
| NiFe-13@CNFs                         | 9.16           | 0.24              | 40.1                         |
| Ni <sub>3</sub> S <sub>2</sub> @CNFs | 7.62           | 0.35              | 9.2                          |
| NiFe-S-31@CNFs                       | 8.63           | 0.61              | 15.8                         |
| NiFe-S-11@CNFs                       | 5.38           | 0.49              | 39.8                         |
| NiFe-S-13@CNFs                       | 4.66           | 0.19              | 53.7                         |

**Table S2** Properties comparison of recent reported electrocatalysts for OER.

| Catalyst                                                              | Overpotential at 10 mA cm <sup>-2</sup> (mV) | Tafel slope (mV dec <sup>-1</sup> ) | Testing substrate | Ref       |
|-----------------------------------------------------------------------|----------------------------------------------|-------------------------------------|-------------------|-----------|
| NiFe-S-13@CNFs                                                        | 270                                          | 44.4                                | No-substrate      | This work |
| (NiFe)S <sub>2</sub> -GN-0.2                                          | 320                                          | 61                                  | GCE <sup>a</sup>  | 3         |
| (NiFe)S <sub>2</sub>                                                  | 262                                          | 56.2                                | GCE               | 4         |
| Ni-Fe-OH@Ni <sub>3</sub> S <sub>2</sub>                               | 165                                          | 93                                  | Nickel foam       | 5         |
| Fe <sub>30</sub> SPyr                                                 | 284                                          | 39                                  | Nickel foam       | 6         |
| (Fe, Ni, Co) <sub>9</sub> S <sub>8</sub> @CS                          | 260                                          | 45                                  | GCE               | 7         |
| Co <sub>9</sub> S <sub>8</sub> /CS-800                                | 370                                          | 98                                  | GCE               | 8         |
| Ni-MoS <sub>2</sub> /NC                                               | 261                                          | 53                                  | RDE <sup>b</sup>  | 9         |
| WS <sub>2</sub> /Co <sub>x</sub> S <sub>y</sub> @N, S-co doped carbon | 365                                          | 53                                  | RDE               | 10        |
| N-doped Ni-Ni <sub>3</sub> S <sub>2</sub> @carbon                     | 284.7                                        | 61                                  | GCE               | 11        |
| CoMoS-600                                                             | 350                                          | 64.32                               | GCE               | 12        |
| Fe-CoS <sub>2</sub> /CoS <sub>2</sub> @NC                             | 300                                          | 72                                  | Carbon paper      | 13        |
| Co@NC@MoS <sub>2</sub>                                                | 297                                          | 70                                  | GCE               | 14        |

a. GCE: glassy carbon electrode; b. RDE: rotating disk electrode

## Reference:

1. C. C. L. McCrory, S. Jung, J. C. Peters and T. F. Jaramillo, *J. Am. Chem. Soc.*, 2013, **135**, 16977-16987.
2. M. Yan, Z. Zhao, P. Cui, K. Mao, C. Chen, X. Wang, Q. Wu, H. Yang, L. Yang and Z. Hu, *Nano Res.*, 2021, **14**, 4220-4226.
3. C. Liu, H. Ma, M. Yuan, Z. Yu, J. Li, K. Shi, Z. Liang, Y. Yang, T. Zhu, G. Sun, H. Li and S. Ma, *Electrochim. Acta*, 2018, **286**, 195-204.
4. B. Ni, T. He, J. O. Wang, S. Zhang, C. Ouyang, Y. Long, J. Zhuang and X. Wang, *Chem Sci*, 2018, **9**, 2762-2767.
5. X. Zou, Y. Liu, G. D. Li, Y. Wu, D. P. Liu, W. Li, H. W. Li, D. Wang, Y. Zhang and X. Zou, *Adv Mater*, 2017, **29**.
6. J. Tzadikov, R. Geva, A. Azoulay and M. Shalom, *ChemCatChem*, 2021, **13**, 3749-3753.
7. Y. Kim, M. Karuppanan, D. Lee, H. E. Bae, Q. T. Luong, S. Y. Kang, Y.-E. Sung, Y.-H. Cho and O. J. Kwon, *Int. J. of Energ. Res.*, 2022, **46**, 3145-3154.
8. W. Li, Y. Li, H. Wang, Y. Cao, H. Yu and F. Peng, *Electrochim. Acta*, 2018, **265**, 32-40.
9. J. Jiang, J. Chen, P. Jiang, Y. Leng and W. Jin, *ChemCatChem*, 2019, **11**, 1185-1191.
10. Z. Huang, Z. Yang, M. Z. Hussain, B. Chen, Q. Jia, Y. Zhu and Y. Xia, *Electrochim. Acta*, 2020, **330**, 135335.
11. Y. Lin, G. Chen, H. Wan, F. Chen, X. Liu and R. Ma, *Small*, 2019, **15**, 1900348.
12. Z. Huang, Z. Yang, Q. Jia, N. Wang, Y. Zhu and Y. Xia, *Nanoscale*, 2022, **14**, 4726-4739.
13. C. Yang, Y.-X. Chang, H. Kang, Y. Li, M. Yan and S. Xu, *App. Phys. A*, 2021, **127**, 465.
14. A. Gaur, P. K. Sachdeva, R. Kumar, T. Maruyama, C. Bera and V. Bagchi, *Sustain. Energ. Fuels*, 2021, **5**, 801-807.
